# Supplementary material for: CaZn(HPO3)2and Ba2Zn(HPO3)3: novel alkaline-earth zincophosphites with diversified anionic frameworks
Source: Royal Society of Chemistry journal article supplement (doi:10.1039/d3dt01321a), 2023-01-01
Supplement: d3dt01321a1.pdf [file d3dt01321a1.pdf]

## **CaZn(HPO<sub>3</sub>)<sub>2</sub> and Ba<sub>2</sub>Zn(HPO<sub>3</sub>)<sub>3</sub> : Novel Alkaline-Earth Zincophosphites with Diversified Anionic Frameworks**

Yu Zhang<sup>a,b</sup> Xia Liu,<sup>a,b</sup> Qian-Yan Liu,<sup>b</sup> Jian-Hua Wang,<sup>b</sup> Ting Hu,<sup>\*c,d</sup> Yan-Mei Lin,<sup>b</sup> and Jian-Han Zhang<sup>\*b</sup>

a.College of Chemical Engineering, Fuzhou University, Fuzhou, 350000 P. R. China.

b.School of Resources & Chemical Engineering, Sanming University, Sanming, 365004 P. R. China. E-mail: zjhsmu@foxmail.com

c.CAS Key Laboratory of Design and Assembly of Functional Nanostructures, Fujian Provincial Key Laboratory of Nanomaterials, Fujian Institute of Research on the Structure of Matter, Chinese Academy of Sciences, Fuzhou, Fujian Province, P. R. China. E-mail: huting148@fjirsm.ac.cn

d.Xiamen Institute of Rare Earth Materials, Haixi Institute, Chinese Academy of Science, Xiamen 361021, P. R. China.

**Table S1:** Fractional Atomic Coordinates ( $\times 10^4$ ) and Equivalent Isotropic Displacement Parameters ( $\text{\AA}^2 \times 10^3$ ) for  $\text{CaZn}(\text{HPO}_3)_2$  and  $\text{Ba}_2\text{Zn}(\text{HPO}_3)_3$ .  $U_{eq}$  is defined as 1/3 of the trace of the orthogonalised  $U_{ij}$ .

| Atom                                                 | Symmetry | x           | y         | z          | $U_{eq}$  | <i>Occu</i> |
|------------------------------------------------------|----------|-------------|-----------|------------|-----------|-------------|
| <b>CaZn(HPO<sub>3</sub>)<sub>2</sub></b>             |          |             |           |            |           |             |
| Zn1                                                  | 4e       | 8923.6(5)   | 1065.4(4) | 5856.3(2)  | 11.12(9)  | 1           |
| Ca1                                                  | 4e       | 4726.5(9)   | 2519.7(6) | 2384.3(4)  | 8.79(11)  | 1           |
| P1                                                   | 4e       | 3899.3(12)  | 2479.6(9) | 4883.6(5)  | 9.46(13)  | 1           |
| P2                                                   | 4e       | 10071.8(11) | 4808.1(8) | 7012.3(5)  | 8.50(13)  | 1           |
| O1                                                   | 4e       | 5231(4)     | 2432(3)   | 3973.5(13) | 19.2(4)   | 1           |
| O2                                                   | 4e       | 1680(3)     | 1204(2)   | 4892.9(13) | 14.0(4)   | 1           |
| O3                                                   | 4e       | 5624(3)     | 2202(3)   | 5752.2(12) | 13.0(4)   | 1           |
| O4                                                   | 4e       | 10768(3)    | 3067(2)   | 6578.4(13) | 13.4(4)   | 1           |
| O5                                                   | 4e       | 7487(3)     | 4854(2)   | 7380.6(14) | 14.3(4)   | 1           |
| O6                                                   | 4e       | 12074(3)    | 5220(2)   | 7781.7(13) | 12.1(4)   | 1           |
| H1                                                   | 4e       | 2920(50)    | 4100(40)  | 5017(19)   | 6(7)      | 1           |
| <b>Ba<sub>2</sub>Zn(HPO<sub>3</sub>)<sub>3</sub></b> |          |             |           |            |           |             |
| Ba1                                                  | 4c       | 4042.2(4)   | 2500      | 4322.4(5)  | 17.89(18) | 0.5         |
| Ba2                                                  | 4c       | 5027.9(4)   | -2500     | 1794.2(5)  | 18.82(18) | 0.5         |
| Zn1                                                  | 4c       | 6714.5(7)   | 2500      | 668.8(9)   | 16.9(3)   | 0.5         |
| P1                                                   | 4c       | 5997.3(18)  | 2500      | 3346(2)    | 20.8(6)   | 0.5         |
| P2                                                   | 4c       | 6193.3(17)  | -2500     | -878(2)    | 18.1(6)   | 0.5         |
| P3                                                   | 4c       | 7854.1(17)  | -2500     | 1463(2)    | 20.6(6)   | 0.5         |
| O1                                                   | 4c       | 6074(6)     | 2500      | 2053(7)    | 68(3)     | 0.5         |
| O2                                                   | 8d       | 5572(4)     | 156(10)   | 3760(5)    | 40.7(17)  | 1           |
| O3                                                   | 4c       | 5720(5)     | -2500     | -1996(6)   | 26.8(19)  | 0.5         |
| O4                                                   | 8d       | 6011(4)     | -146(9)   | -181(4)    | 33.6(14)  | 1           |
| O5                                                   | 4c       | 8749(4)     | -2500     | 1615(6)    | 24.6(18)  | 0.5         |
| O6                                                   | 8d       | 7592(3)     | -65(9)    | 853(4)     | 28.1(13)  | 1           |
| H1                                                   | 4c       | 6730(20)    | 2500      | 3730(80)   | 25        | 0.5         |
| H2                                                   | 4c       | 6970(60)    | -2500     | -1140(80)  | 20(30)    | 0.5         |
| H3                                                   | 4c       | 7500(50)    | -2500     | 2460(40)   | 30(30)    | 0.5         |

**Table S2:** Bond Lengths in  $\text{\AA}$  with calculated bond valence units for  $\text{CaZn}(\text{HPO}_3)_2$  and  $\text{Ba}_2\text{Zn}(\text{HPO}_3)_3$ .

| Bond Lengths                             | (Å)        | Bond Valence  |       |
|------------------------------------------|------------|---------------|-------|
|                                          |            | contributions | sum   |
| <b>CaZn(HPO<sub>3</sub>)<sub>2</sub></b> |            |               |       |
| P1-O1                                    | 1.4982(19) | 1.379         | 3.817 |
| P1-O2                                    | 1.5522(19) | 1.191         |       |

| Bond Lengths                                         | (Å)        | Bond Valence  |       |
|------------------------------------------------------|------------|---------------|-------|
|                                                      |            | contributions | sum   |
| P1-O3                                                | 1.5353(19) | 1.247         |       |
| P2-O4                                                | 1.5241(19) | 1.285         | 3.827 |
| P2-O5                                                | 1.5121(18) | 1.328         |       |
| P2-O6                                                | 1.5451(19) | 1.214         |       |
| Zn1-O2 <sup>2</sup>                                  | 2.0604(18) | 0.382         | 1.906 |
| Zn1-O2 <sup>3</sup>                                  | 2.0592(17) | 0.383         |       |
| Zn1-O3                                               | 1.9920(18) | 0.459         |       |
| Zn1-O4                                               | 2.0834(18) | 0.359         |       |
| Zn1-O6 <sup>1</sup>                                  | 2.1216(18) | 0.323         |       |
| Ca1-O1                                               | 2.2585(19) | 0.455         | 2.161 |
| Ca1-O3 <sup>4</sup>                                  | 2.3865(18) | 0.322         |       |
| Ca1-O4 <sup>5</sup>                                  | 2.4396(19) | 0.279         |       |
| Ca1-O5 <sup>6</sup>                                  | 2.3756(19) | 0.331         |       |
| Ca1-O5 <sup>4</sup>                                  | 2.3590(18) | 0.347         |       |
| Ca1-O6 <sup>5</sup>                                  | 2.6199(19) | 0.171         |       |
| Ca1-O6 <sup>7</sup>                                  | 2.4710(19) | 0.256         |       |
| <b>Ba<sub>2</sub>Zn(HPO<sub>3</sub>)<sub>3</sub></b> |            |               |       |
| P1-O1                                                | 1.496(8)   | 1.387         | 4.043 |
| P1-O2                                                | 1.512(5)   | 1.328         |       |
| P1-O2 <sup>2</sup>                                   | 1.512(5)   | 1.328         |       |
| P2-O3                                                | 1.515(7)   | 1.317         | 3.931 |
| P2-O4                                                | 1.518(5)   | 1.307         |       |
| P2-O4 <sup>2</sup>                                   | 1.518(5)   | 1.307         |       |
| P3-O5                                                | 1.513(7)   | 1.325         | 3.815 |
| P3-O6                                                | 1.536(5)   | 1.245         |       |
| P3-O6 <sup>11</sup>                                  | 1.536(5)   | 1.245         |       |
| Zn1-O1 <sup>8</sup>                                  | 1.925(8)   | 0.55          | 2.13  |
| Zn1-O4 <sup>9</sup>                                  | 2.080(5)   | 0.362         |       |
| Zn1-O4 <sup>10</sup>                                 | 2.080(5)   | 0.362         |       |
| Zn1-O6                                               | 2.018(5)   | 0.428         |       |
| Zn1-O6 <sup>2</sup>                                  | 2.018(5)   | 0.428         |       |
| Ba1-O2                                               | 2.927(6)   | 0.176         | 2.191 |
| Ba1-O2 <sup>2</sup>                                  | 2.927(6)   | 0.176         |       |
| Ba1-O2 <sup>3</sup>                                  | 2.701(5)   | 0.325         |       |
| Ba1-O2 <sup>4</sup>                                  | 2.701(5)   | 0.325         |       |
| Ba1-O3                                               | 2.712(7)   | 0.315         |       |

| Bond Lengths        | (Å)      | Bond Valence  |       |
|---------------------|----------|---------------|-------|
|                     |          | contributions | sum   |
| Ba1-O5              | 2.908(3) | 0.186         |       |
| Ba1-O5 <sup>1</sup> | 2.908(3) | 0.186         |       |
| Ba1-O6              | 2.797(5) | 0.251         |       |
| Ba1-O6 <sup>2</sup> | 2.797(5) | 0.251         |       |
| Ba2-O1 <sup>5</sup> | 3.197(5) | 0.085         | 1.809 |
| Ba2-O1 <sup>6</sup> | 3.197(5) | 0.085         |       |
| Ba2-O2 <sup>6</sup> | 2.822(5) | 0.234         |       |
| Ba2-O2 <sup>7</sup> | 2.822(5) | 0.234         |       |
| Ba2-O3 <sup>5</sup> | 2.946(3) | 0.168         |       |
| Ba2-O3 <sup>6</sup> | 2.946(3) | 0.168         |       |
| Ba2-O4              | 3.078(6) | 0.117         |       |
| Ba2-O4 <sup>2</sup> | 3.078(6) | 0.117         |       |
| Ba2-O4 <sup>6</sup> | 2.912(5) | 0.184         |       |
| Ba2-O4 <sup>7</sup> | 2.912(5) | 0.184         |       |
| Ba2-O5 <sup>6</sup> | 2.824(7) | 0.233         |       |

Symmetry transformations used to generate equivalent atoms. For **CaZn(HPO<sub>3</sub>)<sub>2</sub>**: <sup>1</sup>2-x,-1/2+y,3/2-z; <sup>2</sup>1+x,+y,+z; <sup>3</sup>1-x,-y,1-z; <sup>4</sup>2-x,1/2+y,3/2-z; <sup>5</sup>-1+x,+y,+z. For **Ba<sub>2</sub>Zn(HPO<sub>3</sub>)<sub>3</sub>**: <sup>1</sup>+x,1+y,+z; <sup>2</sup>+x,1/2-y,+z; <sup>3</sup>1-x,-y,1-z; <sup>4</sup>1-x,1/2+y,1-z; <sup>5</sup>1-x,1-y,-z; <sup>6</sup>1-x,-y,-z; <sup>7</sup>1-x,1/2+y,-z; <sup>8</sup>-1/2+x,+y,1/2-z; <sup>9</sup>1/2-x,-y,1/2+z; <sup>10</sup>1/2-x,1/2+y,1/2+z; <sup>11</sup>+x,-1/2-y,+z.

**Table S3:** Bond Angles in ° for CaZn(HPO<sub>3</sub>)<sub>2</sub> and Ba<sub>2</sub>Zn(HPO<sub>3</sub>)<sub>3</sub>.

| Bond Angle                               | (°)       | Bond Angle                            | (°)        |
|------------------------------------------|-----------|---------------------------------------|------------|
| <b>CaZn(HPO<sub>3</sub>)<sub>2</sub></b> |           |                                       |            |
| O3-Zn1-O6 <sup>1</sup>                   | 86.91(7)  | O1-P1-O3                              | 112.78(11) |
| O3-Zn1-O2 <sup>2</sup>                   | 126.75(8) | O3-P1-O2                              | 110.97(11) |
| O3-Zn1-O2 <sup>3</sup>                   | 101.85(8) | O4-P2-O6                              | 106.61(10) |
| O3-Zn1-O4                                | 97.40(7)  | O5-P2-O4                              | 113.86(11) |
| O2 <sup>2</sup> -Zn1-O6 <sup>1</sup>     | 146.11(7) | O5-P2-O6                              | 112.96(10) |
| O2 <sup>3</sup> -Zn1-O6 <sup>1</sup>     | 99.68(7)  | P1-O3-Zn1                             | 129.96(11) |
| O2 <sup>2</sup> -Zn1-O2 <sup>3</sup>     | 79.00(8)  | P2-O6-Zn1 <sup>4</sup>                | 120.60(10) |
| O2 <sup>2</sup> -Zn1-O4                  | 86.54(7)  | Zn1 <sup>5</sup> -O2-Zn1 <sup>3</sup> | 101.00(8)  |
| O2 <sup>3</sup> -Zn1-O4                  | 160.39(7) | P1-O2-Zn1 <sup>3</sup>                | 129.76(10) |
| O4-Zn1-O6 <sup>1</sup>                   | 84.98(7)  | P1-O2-Zn1 <sup>5</sup>                | 128.18(11) |

| Bond Angle                                           | (°)        | Bond Angle             | (°)        |
|------------------------------------------------------|------------|------------------------|------------|
| O1-P1-O2                                             | 112.83(11) | P2-O4-Zn1              | 136.34(11) |
| <b>Ba<sub>2</sub>Zn(HPO<sub>3</sub>)<sub>3</sub></b> |            |                        |            |
| O6 <sub>1</sub> -Zn1-O6                              | 84.9(3)    | O1-P1-O2               | 110.8(3)   |
| O6-Zn1-O4 <sup>2</sup>                               | 90.5(2)    | O1-P1-O2 <sup>1</sup>  | 110.8(3)   |
| O6 <sup>1</sup> -Zn1-O4 <sup>3</sup>                 | 90.5(2)    | O3-P2-O4               | 110.2(3)   |
| O6-Zn1-O4 <sup>3</sup>                               | 156.9(2)   | O3-P2-O4 <sup>1</sup>  | 110.2(3)   |
| O6 <sup>1</sup> -Zn1-O4 <sup>2</sup>                 | 156.9(2)   | O4 <sup>1</sup> -P2-O4 | 110.9(5)   |
| O1 <sup>4</sup> -Zn1-O6 <sup>1</sup>                 | 108.7(2)   | O5-P3-O6               | 109.7(3)   |
| O1 <sup>4</sup> -Zn1-O6                              | 108.7(2)   | O5-P3-O6 <sup>5</sup>  | 109.7(3)   |
| O1 <sup>4</sup> -Zn1-O4 <sup>2</sup>                 | 94.2(3)    | O6 <sup>5</sup> -P3-O6 | 114.6(4)   |
| O1 <sup>4</sup> -Zn1-O4 <sup>3</sup>                 | 94.2(3)    | P1-O1-Zn1 <sup>6</sup> | 150.9(6)   |
| O4 <sup>2</sup> -Zn1-O4 <sup>3</sup>                 | 84.9(3)    | P2-O4-Zn1 <sup>7</sup> | 133.7(4)   |
| O2 <sup>1</sup> -P1-O2                               | 110.8(5)   | P3-O6-Zn1              | 145.6(3)   |

Symmetry transformations used to generate equivalent atoms. For **CaZn(HPO<sub>3</sub>)<sub>2</sub>**: <sup>1</sup>2-x,-1/2+y,3/2-z; <sup>2</sup>1+x,+y,+z; <sup>3</sup>1-x,-y,1-z; <sup>4</sup>2-x,1/2+y,3/2-z; <sup>5</sup>-1+x,+y,+z. For **Ba<sub>2</sub>Zn(HPO<sub>3</sub>)<sub>3</sub>**: <sup>1</sup>+x,1/2-y,+z; <sup>2</sup>1/2-x,-y,1/2+z; <sup>3</sup>1/2-x,1/2+y,1/2+z; <sup>4</sup>-1/2+x,+y,1/2-z; <sup>5</sup>+x,-1/2-y,+z; <sup>6</sup>1/2+x,+y,1/2-z; <sup>7</sup>1/2-x,-y,-1/2+z.

**Table S4:** Anisotropic Displacement Parameters ( $\text{\AA}^2 \times 10^3$ ) for  $\text{CaZn(HPO}_3)_2$  and  $\text{Ba}_2\text{Zn(HPO}_3)_3$ . The Anisotropic displacement factor exponent takes the form:  $-2\pi^2[h^2a^{*2} \times U_{11} + \dots + 2hka^* \times b^* \times U_{12}]$

| Atom                                                 | $U_{11}$ | $U_{22}$  | $U_{33}$  | $U_{23}$  | $U_{13}$ | $U_{12}$  |
|------------------------------------------------------|----------|-----------|-----------|-----------|----------|-----------|
| <b>CaZn(HPO<sub>3</sub>)<sub>2</sub></b>             |          |           |           |           |          |           |
| Zn1                                                  | 9.29(14) | 13.57(16) | 10.58(15) | -2.99(12) | 1.65(11) | -0.54(11) |
| Ca1                                                  | 7.8(2)   | 10.4(2)   | 8.2(2)    | 0.08(18)  | 0.44(17) | 0.22(18)  |
| P1                                                   | 9.1(3)   | 11.0(3)   | 8.3(3)    | 0.1(2)    | -0.8(2)  | -1.0(2)   |
| P2                                                   | 6.7(3)   | 8.8(3)    | 10.0(3)   | -0.1(2)   | -0.1(2)  | 0.2(2)    |
| O1                                                   | 19.4(9)  | 30.0(12)  | 8.3(9)    | 0.4(8)    | 3.0(8)   | -6.7(9)   |
| O2                                                   | 13.0(8)  | 15.1(9)   | 14.1(9)   | -5.4(7)   | 4.4(7)   | -3.6(7)   |
| O3                                                   | 11.7(8)  | 19.8(10)  | 7.4(8)    | -0.4(7)   | -0.5(7)  | 2.3(7)    |
| O4                                                   | 9.5(8)   | 13.3(9)   | 17.3(10)  | -6.5(7)   | -1.0(7)  | 0.8(7)    |
| O5                                                   | 7.6(8)   | 13.3(9)   | 22.0(10)  | -3.6(8)   | 2.6(7)   | -0.4(7)   |
| O6                                                   | 9.3(8)   | 15.0(9)   | 12.0(9)   | -1.5(7)   | -0.4(7)  | -0.2(7)   |
| <b>Ba<sub>2</sub>Zn(HPO<sub>3</sub>)<sub>3</sub></b> |          |           |           |           |          |           |
| Ba1                                                  | 22.4(4)  | 16.4(3)   | 14.9(3)   | 0         | -0.2(3)  | 0         |
| Ba2                                                  | 23.5(4)  | 19.4(3)   | 13.6(3)   | 0         | -0.4(3)  | 0         |
| Zn1                                                  | 19.9(7)  | 15.7(7)   | 15.1(5)   | 0         | -0.7(5)  | 0         |
| P1                                                   | 24.0(16) | 23.9(16)  | 14.5(13)  | 0         | -0.7(12) | 0         |
| P2                                                   | 20.7(16) | 16.1(15)  | 17.5(13)  | 0         | -0.7(11) | 0         |

| Atom | $U_{11}$ | $U_{22}$ | $U_{33}$ | $U_{23}$ | $U_{13}$ | $U_{12}$ |
|------|----------|----------|----------|----------|----------|----------|
| P3   | 21.9(17) | 13.2(15) | 26.8(13) | 0        | 1.5(13)  | 0        |
| O1   | 36(6)    | 149(10)  | 19(4)    | 0        | 14(4)    | 0        |
| O2   | 62(5)    | 20(3)    | 41(3)    | 14(3)    | -24(3)   | -11(3)   |
| O3   | 35(5)    | 30(4)    | 15(3)    | 0        | -2(3)    | 0        |
| O4   | 30(3)    | 30(3)    | 41(3)    | -19(3)   | -12(3)   | 6(3)     |
| O5   | 23(4)    | 10(4)    | 40(4)    | 0        | -13(4)   | 0        |
| O6   | 22(3)    | 13(3)    | 49(3)    | 2(3)     | -4(3)    | 6(2)     |

**Table S5.** State energies(eV) of lowest conduction band (LCB) and the highest valence band (HVB) of  $\text{CaZn}(\text{HPO}_3)_2$  and  $\text{Ba}_2\text{Zn}(\text{HPO}_3)_3$ .

| Formular                                                 | K-point            | LCB     | HVB          |
|----------------------------------------------------------|--------------------|---------|--------------|
| <b><math>\text{CaZn}(\text{HPO}_3)_2</math></b>          | Z (0.0, 0.0, 0.5)  | 5.4052  | -0.11204     |
|                                                          | G (0.0, 0.0, 0.0)  | 5.20954 | -0.000563004 |
|                                                          | (0, 0.125, 0)      | 5.19911 | 0            |
|                                                          | (0, 0.25, 0)       | 5.18555 | -0.00453     |
|                                                          | Y (0.0, 0.5, 0.0)  | 5.263   | -0.06033     |
|                                                          | A (-0.5, 0.5, 0.0) | 5.7438  | -0.13173     |
|                                                          | B (-0.5, 0.0, 0.0) | 5.7979  | -0.03759     |
|                                                          | D (-0.5, 0.0, 0.5) | 5.79497 | -0.12212     |
|                                                          | E (-0.5, 0.5, 0.5) | 5.76559 | -0.15824     |
|                                                          | C (0.0, 0.5, 0.5)  | 5.27145 | -0.13093     |
| <b><math>\text{Ba}_2\text{Zn}(\text{HPO}_3)_3</math></b> | G (0.0, 0.0, 0.0)  | 5.29109 | 0            |
|                                                          | Z (0.0, 0.0, 0.5)  | 5.3396  | -0.03615     |
|                                                          | T (-0.5, 0.0, 0.5) | 5.37882 | -0.03905     |
|                                                          | Y (-0.5, 0.0, 0.0) | 5.3503  | -0.00129     |
|                                                          | S (-0.5, 0.5, 0.0) | 5.51843 | -0.39595     |
|                                                          | X (0.0, 0.5, 0.0)  | 5.53638 | -0.39141     |
|                                                          | U (0.0, 0.5, 0.5)  | 5.53382 | -0.39524     |
|                                                          | R (-0.5, 0.5, 0.5) | 5.53137 | -0.4071      |

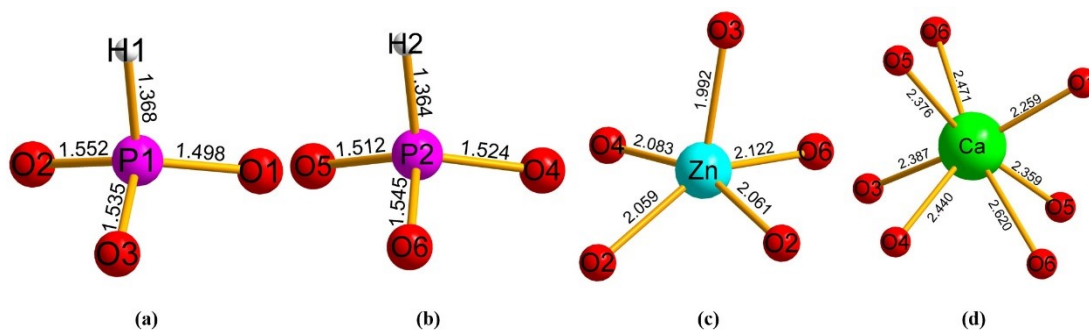

**Figure S1.** Coordination environments of P(1) (a), P(2) (b), Zn(c) and Ca(d) with bond lengths marked (Å) in  $\text{CaZn}(\text{HPO}_3)_2$ .

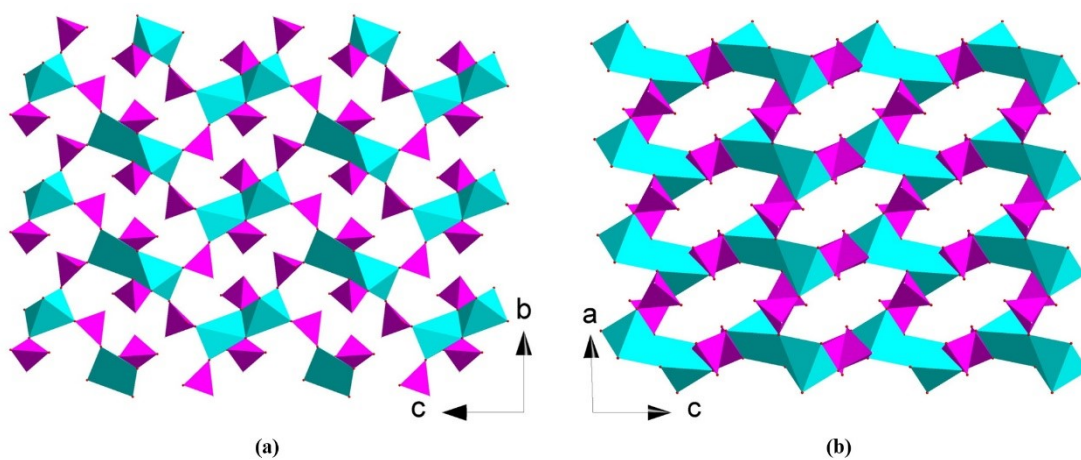

**Figure S2.** The 1D tunnels of anionic framework along *a*- (a) and *b*- (b) axes.

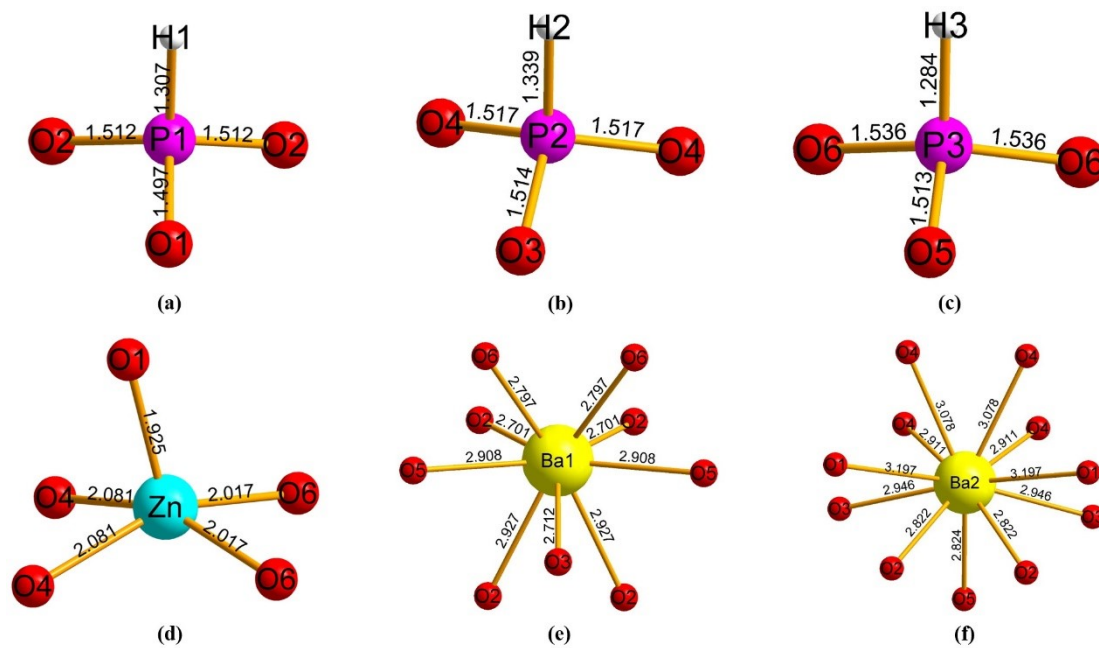

**Figure S3.** Coordination environments of P(1)(a), P(2)(b), P(3)(c), Zn(d), Ba(1)(e) and Ba(2)(f) with bond lengths marked (Å) in  $\text{Ba}_2\text{Zn}(\text{HPO}_3)_3$ .

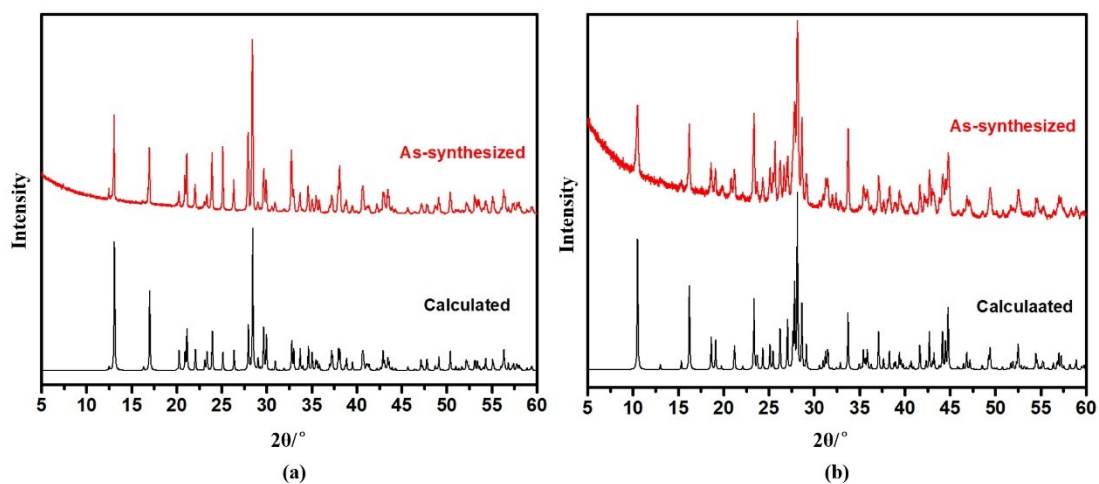

**Figure S4.** XRD patterns of as-synthesized  $\text{CaZn}(\text{HPO}_3)_2$  (a) and  $\text{Ba}_2\text{Zn}(\text{HPO}_3)_3$  (b).

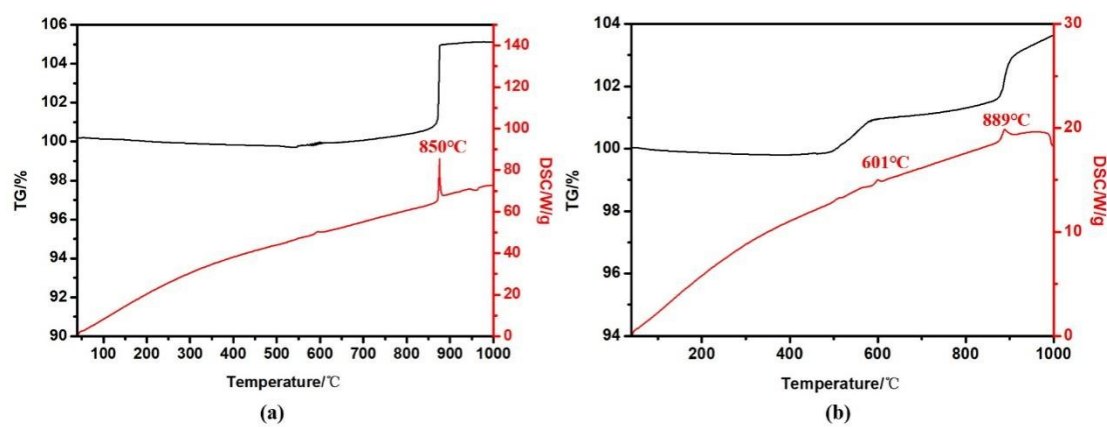

**Figure S5.** TG-DSC curves of  $\text{CaZn}(\text{HPO}_3)_2$  (a) and  $\text{Ba}_2\text{Zn}(\text{HPO}_3)_3$  (b).



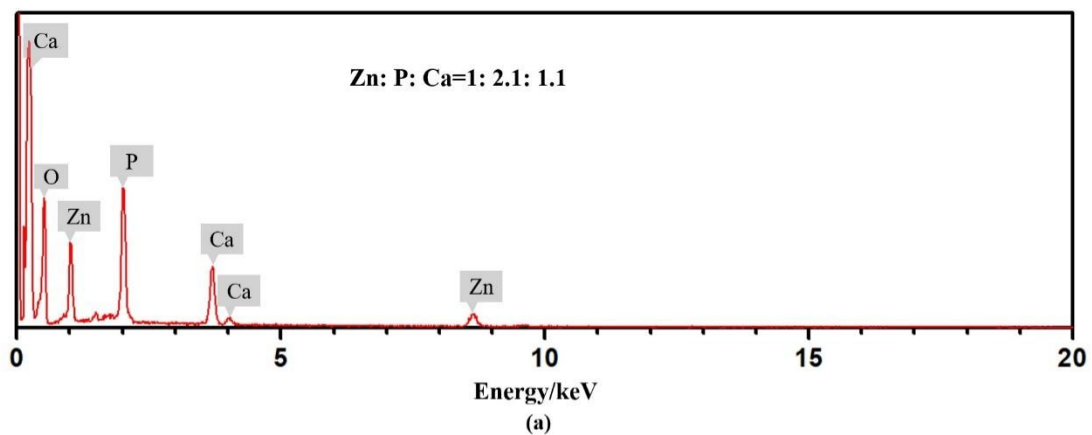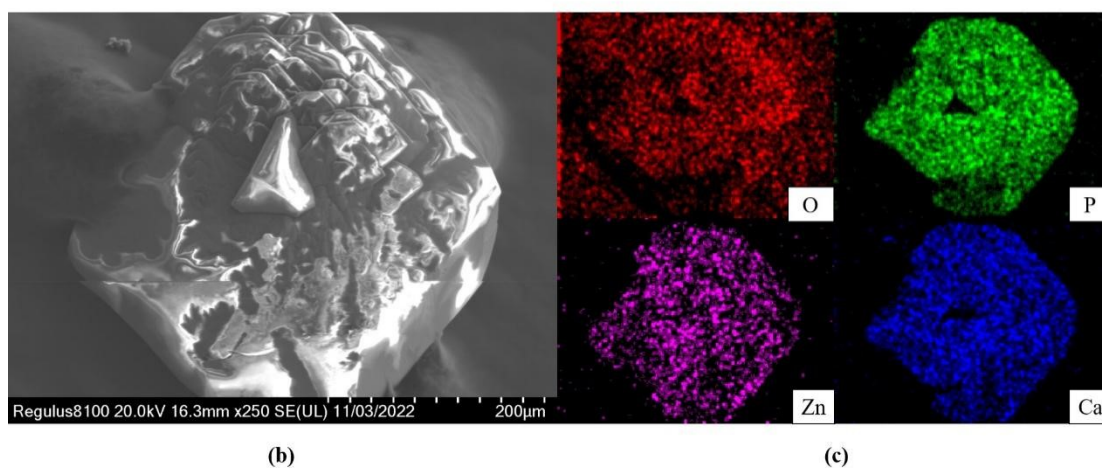

**Figure S6.** (a) Energy dispersive X-ray spectroscopy element analysis on single crystals of  $\text{CaZn}(\text{HPO}_3)_2$  and scanning electron microscopy characterizations (b) with elemental mapping of O, P, Zn and Ca (c).

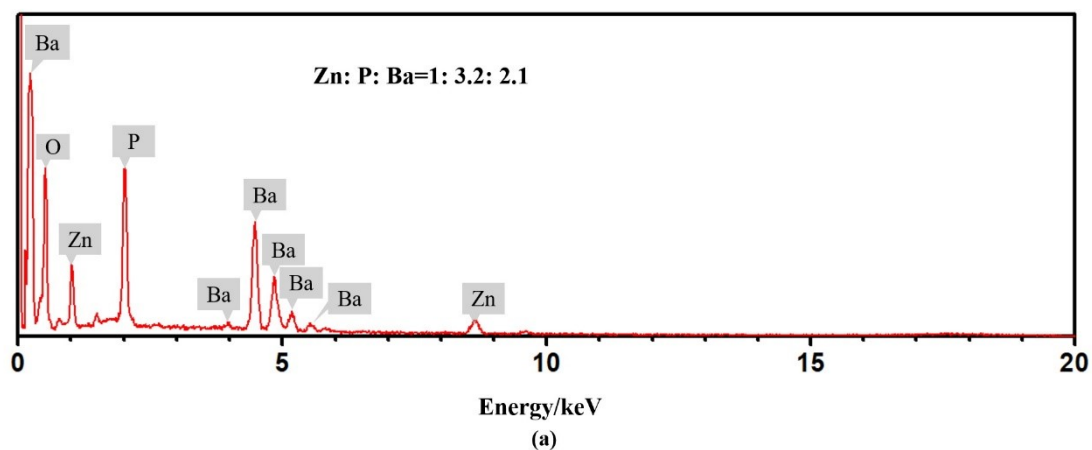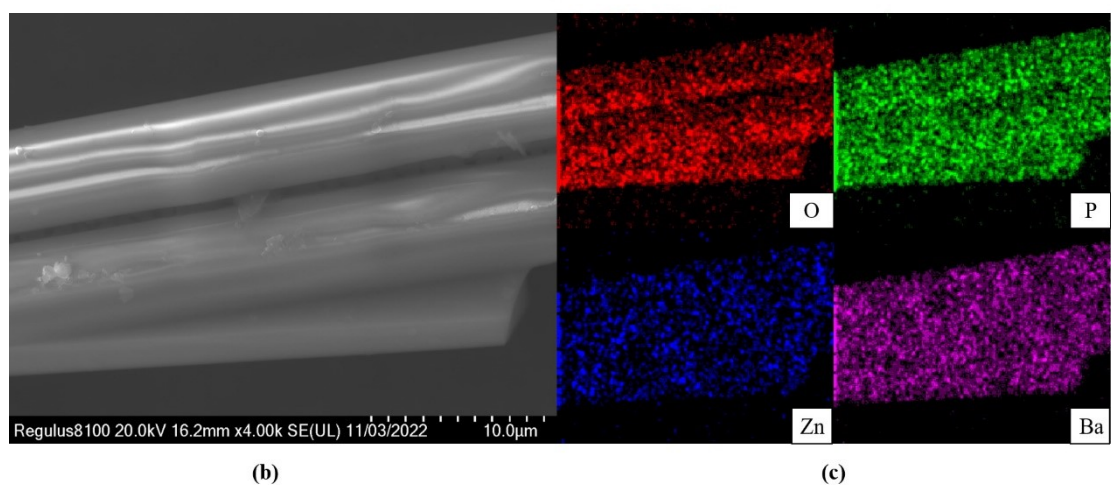

**Figure S7.** (a) Energy dispersive X-ray spectroscopy element analysis on single crystals of  $\text{CaZn}(\text{HPO}_3)_2$  and scanning electron microscopy characterizations (b) with elemental mapping of O, P, Zn and Ba (c).

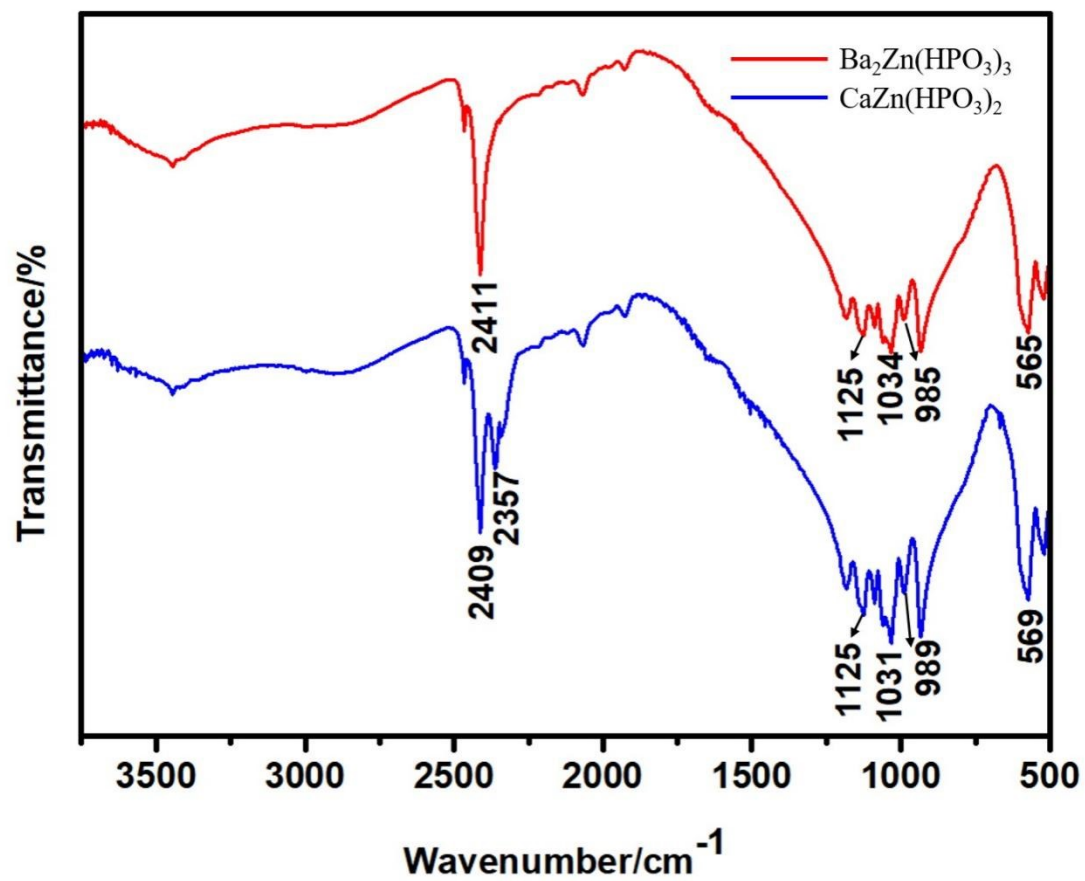

Figure S8. IR spectrum for CaZn(HPO<sub>3</sub>)<sub>2</sub> (blue) and Ba<sub>2</sub>Zn(HPO<sub>3</sub>)<sub>3</sub> (red).

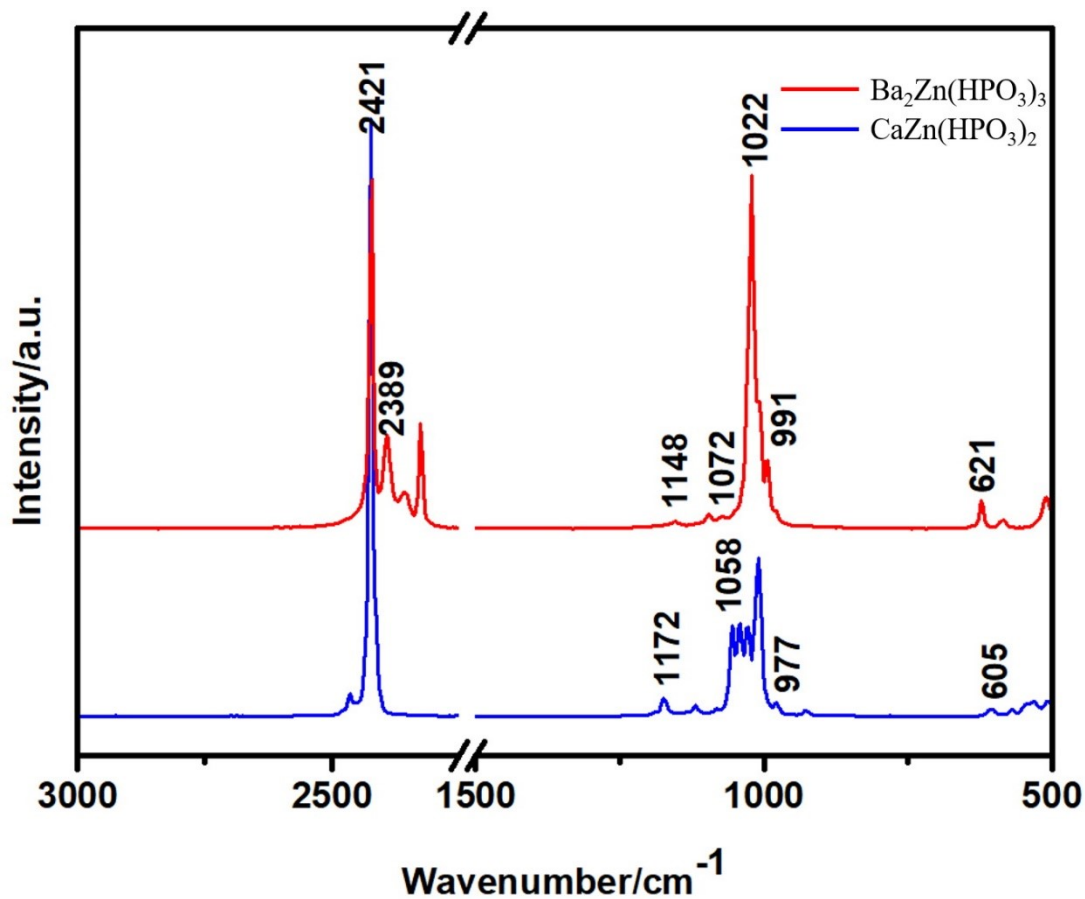

Figure S9. Raman spectrum for  $\text{CaZn}(\text{HPO}_3)_2$  (blue) and  $\text{Ba}_2\text{Zn}(\text{HPO}_3)_3$  (red).

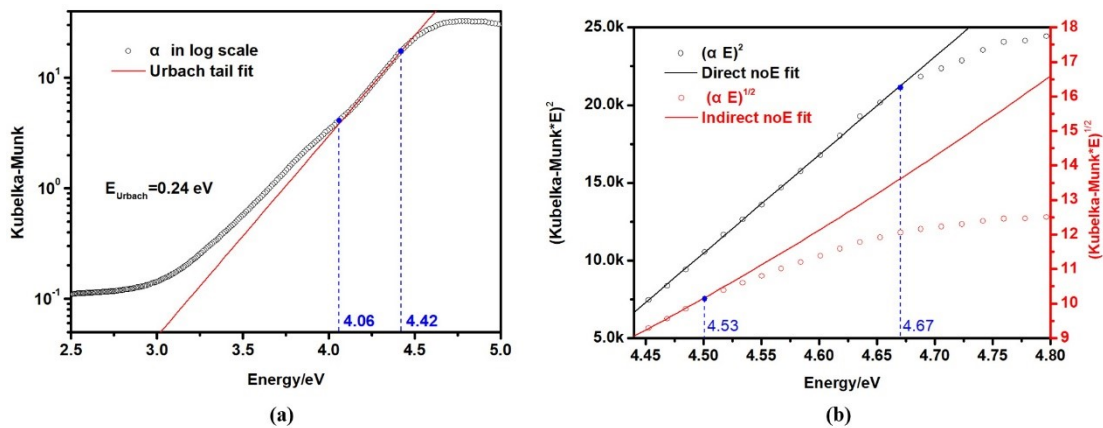

Figure S10. (a) Urbach tail fitting on a log scale KM data of  $\text{CaZn}(\text{HPO}_3)_2$ . (b) Direct or indirect bandgap determination by using optical energy above Urbach tail.

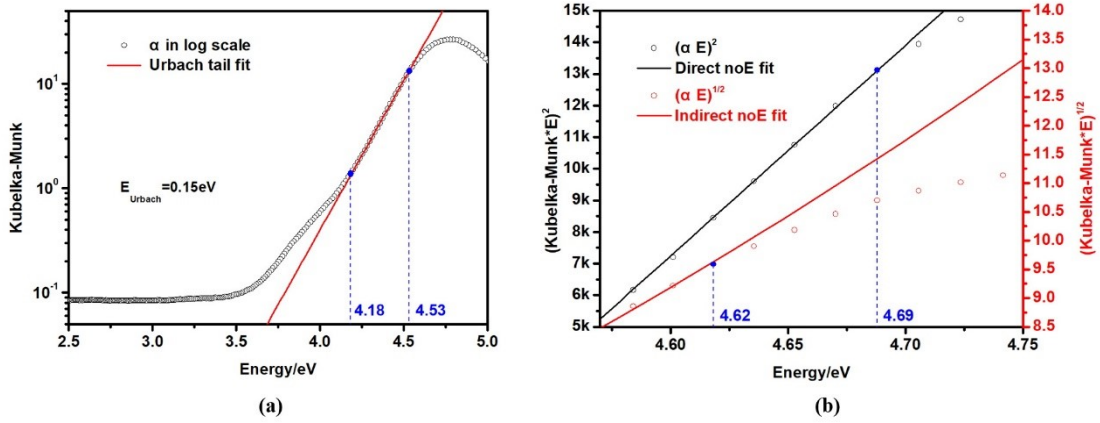

**Figure S11.** (a) Urbach tail fitting on a log scale KM data of  $\text{Ba}_2\text{Zn}(\text{HPO}_3)_3$ . (b) Direct or indirect bandgap determination by using optical energy above Urbach tail.

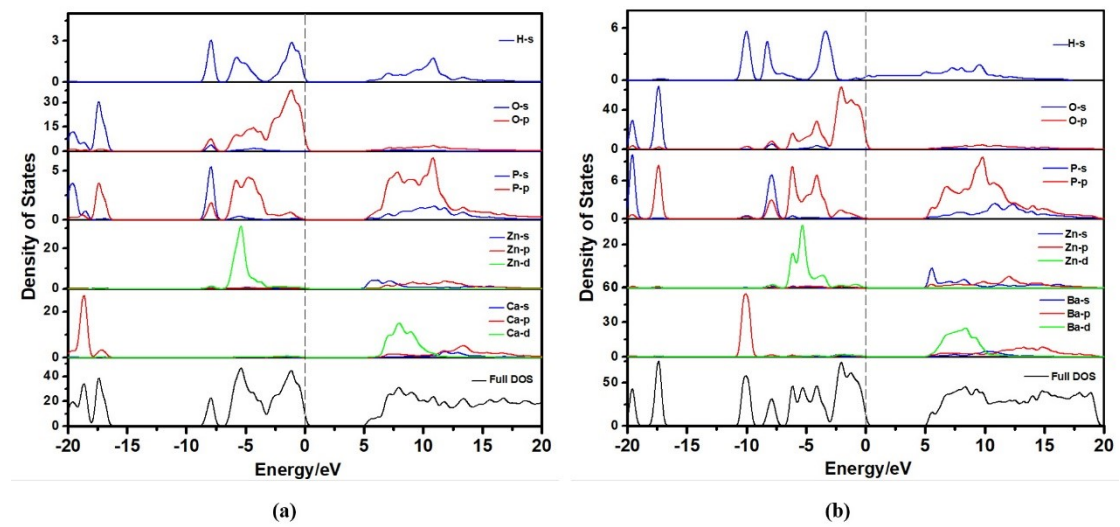

**Figure S12.** Total and partial DOS of states for  $\text{CaZn}(\text{HPO}_3)_2$  (a) and  $\text{Ba}_2\text{Zn}(\text{HPO}_3)_3$  (b); the Fermi level is normalized to 0 eV.
